# Supplementary material for: New Insights into the Taxonomy of Malacopsylloidea Superfamily (Siphonaptera) Based on Morphological, Molecular and Phylogenetic Characterization of Phthiropsylla agenoris (Malacopsyllidae) and Polygenis (Polygenis) rimatus (Rhopalopsyllidae)
Source: MDPI journal article supplement (doi:10.3390/d15020308), 2023-02-20
Supplement: s1 [file s1]

**Table S1.** PCR mix, primers and conditions used for each molecular marker sequenced in this study.

|                                                 | <i>Cox2</i>      | <i>ITS2</i>      | <i>Cytb</i>      | <i>Cox1</i>      | <i>EF1-<math>\alpha</math></i> |
|-------------------------------------------------|------------------|------------------|------------------|------------------|--------------------------------|
| <b>PCR Mix</b>                                  |                  |                  |                  |                  |                                |
| Forward Primer (10 $\mu$ M)                     | 5 $\mu$ l                      |
| Reverse Primer (10 $\mu$ M)                     | 5 $\mu$ l                      |
| Template DNA                                    | 5 $\mu$ l                      |
| <i>goTaq</i> G2 Green Master Mix DNA polymerase | 25 $\mu$ l                     |
| Autoclaved distilled water to                   | 50 $\mu$ l                     |
| <b>PCR Primers</b>                              |                  |                  |                  |                  |                                |
| Forward Primer                                  | F-Leu [28]       | senITS2 [57]     | CytbF [63]       | LCO1490 [64]     | M47F [61]                      |
| Reverse Primer                                  | R-Lys [28]       | ITS2R [62]       | A5F [63]         | HCO2198 [64]     | rcM4.0 [28]                    |
| <b>PCR Conditions</b>                           |                  |                  |                  |                  |                                |
| Initial Denaturing                              | 95 °C for 3 min  | 94 °C for 5 min  | 95 °C for 12 min | 96 °C for 2 min  | 94 °C for 5 min                |
| Number of cycles                                | 37               | 35               | 30               | 40               | 40                             |
| Denaturing                                      | 94 °C for 30 sec | 94 °C for 60 sec | 95 °C for 30 sec | 94 °C for 30 sec | 94 °C for 30 sec               |
| Annealing                                       | 42 °C for 30 sec | 55 °C for 60 sec | 40 °C for 30 sec | 50 °C for 30 sec | 56 °C for 45 sec               |
| Primer extension                                | 72 °C for 15 sec | 72 °C for 60 sec | 68 °C for 2 min  | 72 °C for 60 sec | 72 °C for 60 sec               |
| Final extension                                 | 72 °C for 5 min  | 72 °C for 10 min | 68 °C for 7 min  | 72 °C for 7 min  | 72 °C for 7 min                |

**Table S2.** List of taxa used in the analysis, including GenBank accession numbers and taxonomic information.

| Species                                           | Family             | Accession number ( <i>cox1-cox2-cytb- EFl-a</i> ) |
|---------------------------------------------------|--------------------|---------------------------------------------------|
| <i>Pulex irritans</i>                             | Pulicidae          | LT797469-LR991748-LT797480-LR744002               |
| <i>Pulex irritans</i>                             | Pulicidae          | LT797466-LR991746-LT797474-LR744005               |
| <i>Archaeopsylla erinacei</i>                     | Pulicidae          | LT604115-LR991706-LT604120-LR744008               |
| <i>Archaeopsylla erinacei</i>                     | Pulicidae          | LT627349-LR991707-LT627350-LR744010               |
| <i>Ctenocephalides felis</i>                      | Pulicidae          | LN827896-LR991701- LN899587-LR743995              |
| <i>Ctenocephalides felis</i>                      | Pulicidae          | LN827900-LR991704- LN899588-LR743997              |
| <i>Ctenocephalides canis</i>                      | Pulicidae          | MN173763-LR991705-LN899589-LR743998               |
| <i>Echidnophaga</i> sp.                           | Pulicidae          | KT376440-MW074397-KM890719-EU336268               |
| <i>Stenoponia tripectinata tripectinata</i>       | Stenoponiidae      | LK937071-LR989043-LN897473-LR989029               |
| <i>Stenoponia tripectinata tripectinata</i>       | Stenoponiidae      | LK937072-LR989044-LN897472-LR989030               |
| <i>Stenoponia americana</i>                       | Stenoponiidae      | KM891021-AF424014-KM890757-KM890584               |
| <i>Nosopsyllus fasciatus</i>                      | Ceratophyllidae    | LT158040-MG637390-LT158052-LR743999               |
| <i>Nosopsyllus barbarus</i>                       | Ceratophyllidae    | LN881550-LR991719-LN897469-LR744000               |
| <i>Ceratophyllus gallinae</i>                     | Ceratophyllidae    | KM890960-EU335976-KM890599-EU336255               |
| <i>Chaetopsylla appropinquans</i>                 | Vermipsyllidae     | KM890910-KM890777-KM890642-KM890480               |
| <i>Stephanocircus dasyuri</i>                     | Stephanocircidae   | JN008920-KM890795-KM890658-EU336298               |
| <i>Stephanocircus pectinipes</i>                  | Stephanocircidae   | JN008923-EU336002-KM890619-EU336301               |
| <i>Craneopsylla minerva</i>                       | Stephanocircidae   | KM891000-KM890871-KM890735-EU336321               |
| <i>Tiarapsylla argentina</i>                      | Stephanocircidae   | KM890996-KM890867-KM890731-KM89056                |
| <i>Hystrichopsylla dippei</i>                     | Hystrichopsyllidae | KM891010-KM890881-KM890747-KM890573               |
| <i>Hystrichopsylla orophila</i>                   | Hystrichopsyllidae | KM890902-EU336020-KM890632-KM890472               |
| <i>Nearctopsylla genalis</i>                      | Hystrichopsyllidae | HM398835-KM890866-KM890730-KM890560               |
| <i>Nearctopsylla hyrtaci</i>                      | Hystrichopsyllidae | KM890922-KM890792-KM890655-KM890493               |
| <i>Neotyphloceras crassispina</i>                 | Hystrichopsyllidae | KM890944-KM890814-KM890677-KM890513               |
| <i>Chiliopsylla allophyla</i>                     | Hystrichopsyllidae | KM891001-KM890872-KM890736-KM890566               |
| <i>Rhadinopsylla</i> sp.                          | Ctenophthalmidae   | MG138217-KM890851-KM890715-EU336269               |
| <i>Rhadinopsylla</i> sp.                          | Ctenophthalmidae   | MG138218-KM890784-KM890648-EU336246               |
| <i>Ctenophthalmus cryptotis</i>                   | Ctenophthalmidae   | KM890939-KM890809-KM890672-KM890508               |
| <i>Ctenophthalmus congeneroides congeneroides</i> | Ctenophthalmidae   | KM890918-KM890788-KM89065-KM890489                |
| <i>Ctenophthalmus baeticus boisseauorum</i>       | Ctenophthalmidae   | LR594449-LR991708-LR594470-LR743655               |
| <i>Ctenophthalmus apertus allani</i>              | Ctenophthalmidae   | LR594443-LR991710-LR594464-LR743648               |
| <i>Neopsylla abagaitui</i>                        | Ctenophthalmidae   | MG138235-KM890847-KM890711-KM890711               |
| <i>Neopsylla mana</i>                             | Ctenophthalmidae   | MF000646-KM890849-KM890712-KM890544               |
| <i>Pygiopsylla hoplia</i>                         | Pygiopsyllidae     | KM890924-KM890794-KM890657-KM890495               |
| <i>Parastivalius novaeguinae</i>                  | Stivaliidae        | KM890901-KM890769-KM890629-EU336324               |
| <i>Tetrapsyllus rhombus</i>                       | Rhopalopsyllidae   | KM890937-KM890807-KM890670-KM890506               |
| <i>Tetrapsyllus maulinus</i>                      | Rhopalopsyllidae   | KM890997-KM890868-KM890671-KM890562               |
| <i>Listronius fortis</i>                          | Rhopalopsyllidae   | KM890942-KM890812-KM890675-KM890511               |
| <i>Polygenis</i> sp.                              | Rhopalopsyllidae   | KM890907-AF424043-KM890639-EU336289               |
| <i>Polygenis roberti</i>                          | Rhopalopsyllidae   | KM890958-KM890830-KM890693-KM890524               |
| <i>Parapsyllus</i> sp.                            | Rhopalopsyllidae   | MK104350-EU335985-KM890604-EU336266               |
| <i>Ectinorus lareschiae</i>                       | Rhopalopsyllidae   | KM890949-KM890820-KM890683-KM890519               |
| <i>Ectinorus ixanus</i>                           | Rhopalopsyllidae   | KM890943-KM890813-KM890676-KM890512               |
| <i>Malacopsylla grossiventris</i>                 | Malacopsyllidae    | KM890898-KM890762-KM890589-KM890469               |
| <i>Phthiropsylla agenoris</i>                     | Malacopsyllidae    | KM891005-KM890763-KM890742- KM890470              |
| <i>Panorpa meridionalis</i>                       | Panorpidae         | LT604125-LR991718-LT604127-LR744012               |
| <i>Panorpa meridionalis</i>                       | Panorpidae         | LT604126-LR991717-LT604128-LR744013               |
| <i>Panorpa meridionalis</i>                       | Panorpidae         | LT604125-LR991716-LT604127-LR744014               |
